# Supplementary material
Source: publisher figshare collection journal article supplement (https://gsapubs.figshare.com/ndownloader/files/23305961)
Supplement: Supplementary file 1 [file 23305961]

1 GSA Data Repository 2017354

2 **Evidence for a dynamic grounding-line in outer Filchner**  
3 **Trough, Antarctica, until the early Holocene**

4 *Jan Erik Arndt, Claus-Dieter Hillenbrand, Hannes Grobe, Gerhard Kuhn, and*

5 *Lukas Wacker*

6

7 **MATERIAL, METHODS AND LABORATORY TECHNIQUES**

8 **Marine geophysical data**

9 Most of the multibeam bathymetry data and acoustic sub-bottom profiles from the  
10 study area (Fig. 1a) were collected on expedition PS96 with RV *Polarstern* in austral  
11 summer 2015/2016 using the hull-mounted Atlas-Teledyne Hydrosweep DS3 and  
12 Parasound P-70 systems (Schröder, 2016). Pre-existing bathymetric data acquired  
13 during expeditions JR97 (2005) with RRS *James Clark Ross* using a Kongsberg-  
14 Simrad EM120 system and ANT-VIII/5 (1989/1990) with RV *Polarstern* using an  
15 Atlas Hydrosweep DS1 system (Miller and Oerter, 1991) were added to the  
16 bathymetry map of the study area. All bathymetric data were corrected on board by  
17 applying sound velocity profiles derived from conductivity-temperature-depth casts  
18 and post-processed to reject outlying soundings in CARIS Hips & Sips or in MB  
19 System, respectively. The final database was jointly gridded at  $25 \times 25$  m resolution  
20 with a weighted moving average gridding algorithm in QPS Fledermaus.

21

## **Marine geological data**

**Methods:** Gravity cores PS96/079-3 and PS96/080-1 were recovered on cruise PS96 from the study area (Fig. 1a; Table DR1) (Schröder, 2016). Physical properties (magnetic susceptibility, wet bulk density and P-wave velocity) were measured at 1-cm intervals on the whole cores with a GEOTEK multi-sensor core logger (MSCL) at the Alfred Wegener Institute in Bremerhaven. The cores were then split into working and archive halves, and their lithology and sedimentary structures were described visually, using X-radiographs and using smear slides. Shear strength was measured on the working halves of the cores with a hand-held shear vane. Water content and grain-size composition were analyzed on discrete samples taken from the cores. Water content was determined by weighing of the wet and freeze-dried samples, and gravel (>2 mm), sand (63  $\mu$ m-2 mm) and mud (2  $\mu$ m-63  $\mu$ m) contents were analyzed by wet and dry sieving of 1-cm thick sediment samples taken from the working halves of the cores (volume: ca. 50 cm<sup>3</sup>). Because gravel content may not be determined in a statistically reliable way on samples of this volume, we only present the sand and mud contents in Figure 2, which inform on the grain-size composition of the matrix of the sediments. Gravel and pebble abundance was evaluated visually and on the X-radiographs. The sand fraction was investigated under a microscope for the presence of calcareous microfossils.

**Lithofacies classification and interpretation:** The sediments recovered in cores PS96/079-3 and PS96/080-1 were assigned to seven different lithofacies, with each facies occurring in one of the cores only. The characteristics of each lithofacies and

the interpretation of their depositional and their paleoenvironmental settings, which followed previously published literature on lithofacies in marine sediment cores from glaciated continental margins, are given in Table DR1. X-radiograph examples for each lithofacies are given in Figure DR5.

**Chronology:** Two horizons in each core were identified, which contained a few calcareous foraminifer shells (benthic species *Globocassidulina* spp. and *Cibicidoides* spp. and planktic species *Neogloboquadrina pachyderma* sinistral). Importantly, the two dated horizons in core PS96/079-3 are from lithofacies showing no indication of sediment reworking by gravitational downslope or glacial processes (Fig. DR6). All the foraminifer shells were picked for MICADAS AMS  $^{14}\text{C}$  dating (Wacker et al., 2010) at the Laboratory of Ion Beam Physics, ETH Zürich. The  $^{14}\text{C}$  dates were calibrated with the CALIB 7.1 calibration program (Stuiver and Reimer, 1993) using a regional marine reservoir correction of  $1215 \pm 30$  years (Hillenbrand et al., 2012) and the MARINE13 calibration dataset (Reimer et al., 2013) (Table DR2). For the full set of core photos and X-radiographs of cores PS96/079-3 and PS96/080-1, see <https://doi.org/10.1594/PANGAEA.864391> and <https://doi.org/10.1594/PANGAEA.864392>, respectively.

63 **Table DR1:** Summary of lithofacies observed in the studied cores, and inferred processes and paleoenvironments. Preferred  
64 interpretations for each lithofacies are underlined. References: 1) McKay et al., 2009; 2) McKay et al., 2012; 3) Passchier et al.,  
65 2011; 4) Tripsanas et al., 2008; 5) Hillenbrand et al., 2010; 6) Licht et al., 1999; 7) Domack et al., 1999.

| Facies | Core       | Depth (cmbsf)                                            | Lithology and sedimentary structure                                                      | Depositional process and environmental setting                                                                                                                                                           |
|--------|------------|----------------------------------------------------------|------------------------------------------------------------------------------------------|----------------------------------------------------------------------------------------------------------------------------------------------------------------------------------------------------------|
| MI     | PS96/079-3 | [156/158]-[162/164]                                      | laminated mud                                                                            | <u>Hemipelagic suspension settling<sup>1,2</sup></u>                                                                                                                                                     |
| MGS1   | PS96/079-3 | 0-28<br>76-117<br>[129/132]-[156/158]<br>[162/164]-181.5 | laminated and stratified mud alternating with gravelly sandy mud and gravelly muddy sand | <u>Suspension settling from turbid plumes<sup>1,3</sup>, current-influenced glacialmarine deposition<sup>3</sup>, hemipelagic sedimentation with deposition of ice-rafted debris (IRD)<sup>1,3</sup></u> |
| Mf     | PS96/079-3 | 28-76                                                    | folded mud                                                                               | <u>Debris flow<sup>4</sup>, slump<sup>4</sup></u>                                                                                                                                                        |
| SGMm   | PS96/079-3 | 117-[129/132]                                            | massive gravelly muddy sand with inclined (erosional) base                               | <u>Redeposition by mass flow<sup>1,3</sup>, ice-shelf collapse sediment<sup>3</sup></u>                                                                                                                  |
| MSI    | PS96/080-1 | 25-51                                                    | consolidated sandy mud with gravel- to pebble-sized intraclasts                          | <u>Glacialmarine deposition proximal to grounding line<sup>2</sup>, mass flow deposit<sup>2</sup></u>                                                                                                    |
| Dmb    | PS96/080-1 | 0-[10/11]                                                | massive muddy diamicton with some microfossils (here: diatoms)                           | <u>Glacialmarine deposition proximal to grounding line<sup>5,6</sup>, iceberg-rafted diamicton<sup>5,7</sup>, iceberg turbate<sup>5,6</sup></u>                                                          |
| Dmt    | PS96/080-1 | [10/11]-25<br>51-223                                     | massive, purely terrigenous muddy diamicton                                              | <u>Subglacial till deposition<sup>1-3,5-7</sup>, IRD rainout proximal to grounding line<sup>1-3</sup>, glacialgenic debris flow<sup>1,5</sup></u>                                                        |

**Table DR2:** Locations, conventional and calibrated AMS  $^{14}\text{C}$  dates on calcareous microfossils from the investigated and previously published sediment cores from the Weddell Sea (for uncertainties affecting  $^{14}\text{C}$  dating of Antarctic shelf sediments, see Heroy and Anderson, 2007). Sample depths are given in centimetres below seafloor (cmbsf). All  $^{14}\text{C}$ -dates were corrected using an offset ( $\Delta R$ ) of  $815 \pm 30$  years from the global marine reservoir effect (R) of 400 years in accordance with both an uncorrected  $^{14}\text{C}$ -date of seafloor surface sediments from the uppermost continental slope (see conventional  $^{14}\text{C}$ -age given in italics) and previous studies from around Antarctica (e.g. RAISED Consortium, 2014). The corrected  $^{14}\text{C}$ -dates were calibrated with the CALIB Radiocarbon Calibration Program version 7.1.0html (<http://calib.qub.ac.uk/calib/>; Stuiver and Reimer, 1993) using the MARINE13 calibration dataset (Reimer et al., 2013). Errors of calibrated dates are given as a  $2\sigma$  range. The  $^{14}\text{C}$ -dates marking minimum ages for grounded ice retreat from a core site are highlighted in bold. Coring devices: GBC: giant box core, GC: gravity core, PH: phleger core, PC: piston core. Dated calcareous microfossils comprise benthic foraminifera (bF: unspecified benthic foraminifera, C: *Cibicides* spp., G: *Globocassidulina* spp.), planktic foraminifera (N: *Neogloboquadrina pachyderma* sinistral) and bryozoans (B). If known, number of dated foraminifer shells is also given. X-radiographs of dated horizons in cores PS96/079-3 and PS96/080-1 are shown in Figure DR6. Preservation of all dated foraminifer shells was modest. References: A) Hillenbrand et al., 2012; B) Stollendorf et al., 2012; C) Anderson and Andrews, 1999.

| Area                           | Cruise   | Gear | Core ID   | Latitude (°) | Longitude (°) | Water depth (m) | Core recovery (m) | Sample depth (cmbsf) | Laboratory code | Dated microfossils (n) | Conventional $^{14}\text{C}$ age $\pm$ error (yrs BP) | R (yrs) | $\Delta R$ $\pm$ error (yrs) | Calibrated $^{14}\text{C}$ age $\pm$ error (cal yrs BP) | Reference  |
|--------------------------------|----------|------|-----------|--------------|---------------|-----------------|-------------------|----------------------|-----------------|------------------------|-------------------------------------------------------|---------|------------------------------|---------------------------------------------------------|------------|
| Filchner Trough (outer shelf)  | PS96     | GC   | PS96/79-3 | -75.6250     | -31.8722      | 763             | 1.81              | 17                   | ETH-74959.1.1   | G (35), C (1)          | 9995 $\pm$ 75                                         | 400     | 815 $\pm$ 30                 | 9934 $\pm$ 243                                          | this study |
|                                |          |      |           |              |               |                 |                   | 150                  | ETH-74960.1.1   | G (4), C (1), N (3)    | 24560 $\pm$ 250                                       | 400     | 815 $\pm$ 30                 | 27530 $\pm$ 387                                         | this study |
| Filchner Trough (outer shelf)  | PS96     | GC   | PS96/80-1 | -75.6890     | -31.7983      | 720             | 2.23              | 20                   | ETH-74961.1.1   | G (28)                 | 14120 $\pm$ 90                                        | 400     | 815 $\pm$ 30                 | 15436 $\pm$ 299                                         | this study |
|                                |          |      |           |              |               |                 |                   | 120                  | ETH-74962.1.1   | G (21)                 | 11415 $\pm$ 85                                        | 400     | 815 $\pm$ 30                 | 11836 $\pm$ 447                                         | this study |
| E' Cray Fan (uppermost slope)  | ANT-IV/3 | GBC  | PS1418-1  | -74.4750     | -35.5933      | 769             | 4.89              | 0-1                  | HD-13273        | B                      | 1215 $\pm$ 30                                         | N/A     | N/A                          | [0]                                                     | ref. A     |
| Filchner Trough (mid-shelf)    | IWSOE69  | PC   | G7        | -77.3330     | -36.5500      | 1079            | 1.57              | 0-5                  | CCAMS-95867     | bF                     | 9040 $\pm$ 100                                        | 400     | 815 $\pm$ 30                 | 8738 $\pm$ 273                                          | ref. B     |
| Weddell Sea (continental rise) | IWSOE68  | PH   | 37        | -69.6833     | -46.2670      | 3777            | 0.90              | 56-60                | AA-24841        | N                      | 26570 $\pm$ 490                                       | 400     | 815 $\pm$ 30                 | 29580 $\pm$ 1092                                        | ref. C     |
| Weddell Sea (continental rise) | IWSOE68  | PH   | 52        | -67.3667     | -47.3667      | 3768            | 0.85              | 42-47                | AA-19910        | N (800)                | 25900 $\pm$ 620                                       | 400     | 815 $\pm$ 30                 | 28930 $\pm$ 1287                                        | ref. C     |

81 **Figure DR1:** Locations of the investigated and previously published sediment cores  
 82 from the Weddell Sea. Background data from IBCSO V1.0, Arndt et al. 2013.

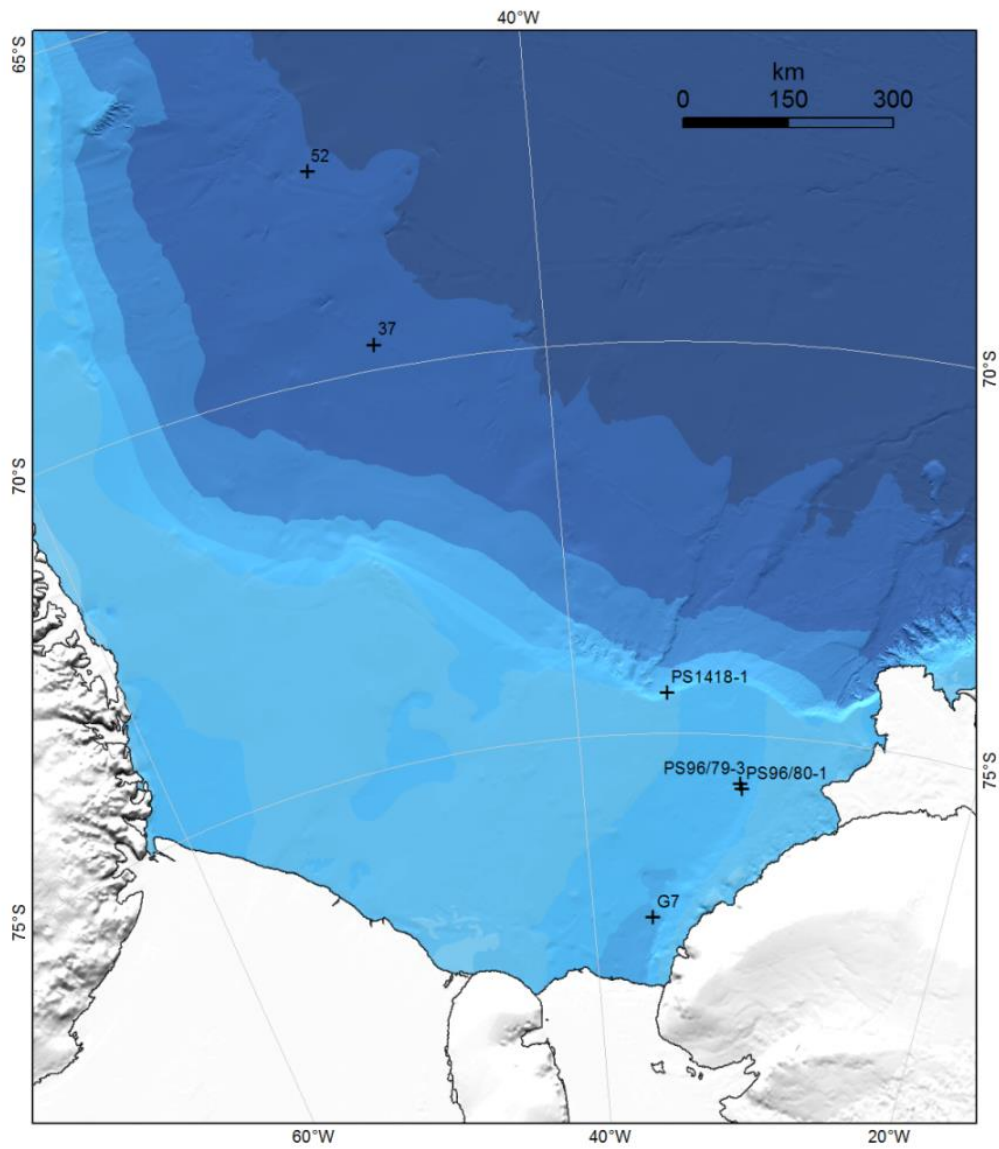

**Figure DR2:** (A) Line drawing of interpreted submarine landforms with locations of bathymetric profiles: (B) along the trough centre over GZW 1b; (C) across GZW 1a and GZW 1b.

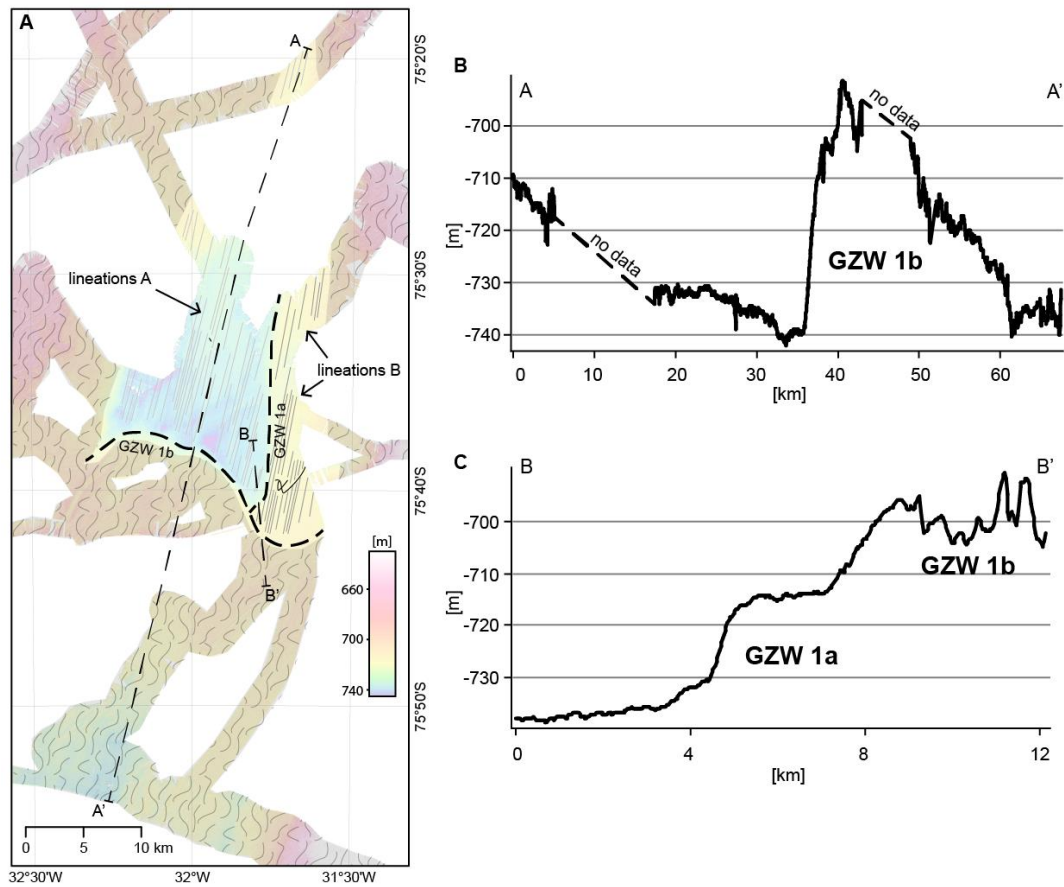



88 **Figure DR3:** Detailed sub-bottom profiler (PARASOUND) transects from core  
 89 locations and other transitions from draped lineations to GZW 1a and 1b.

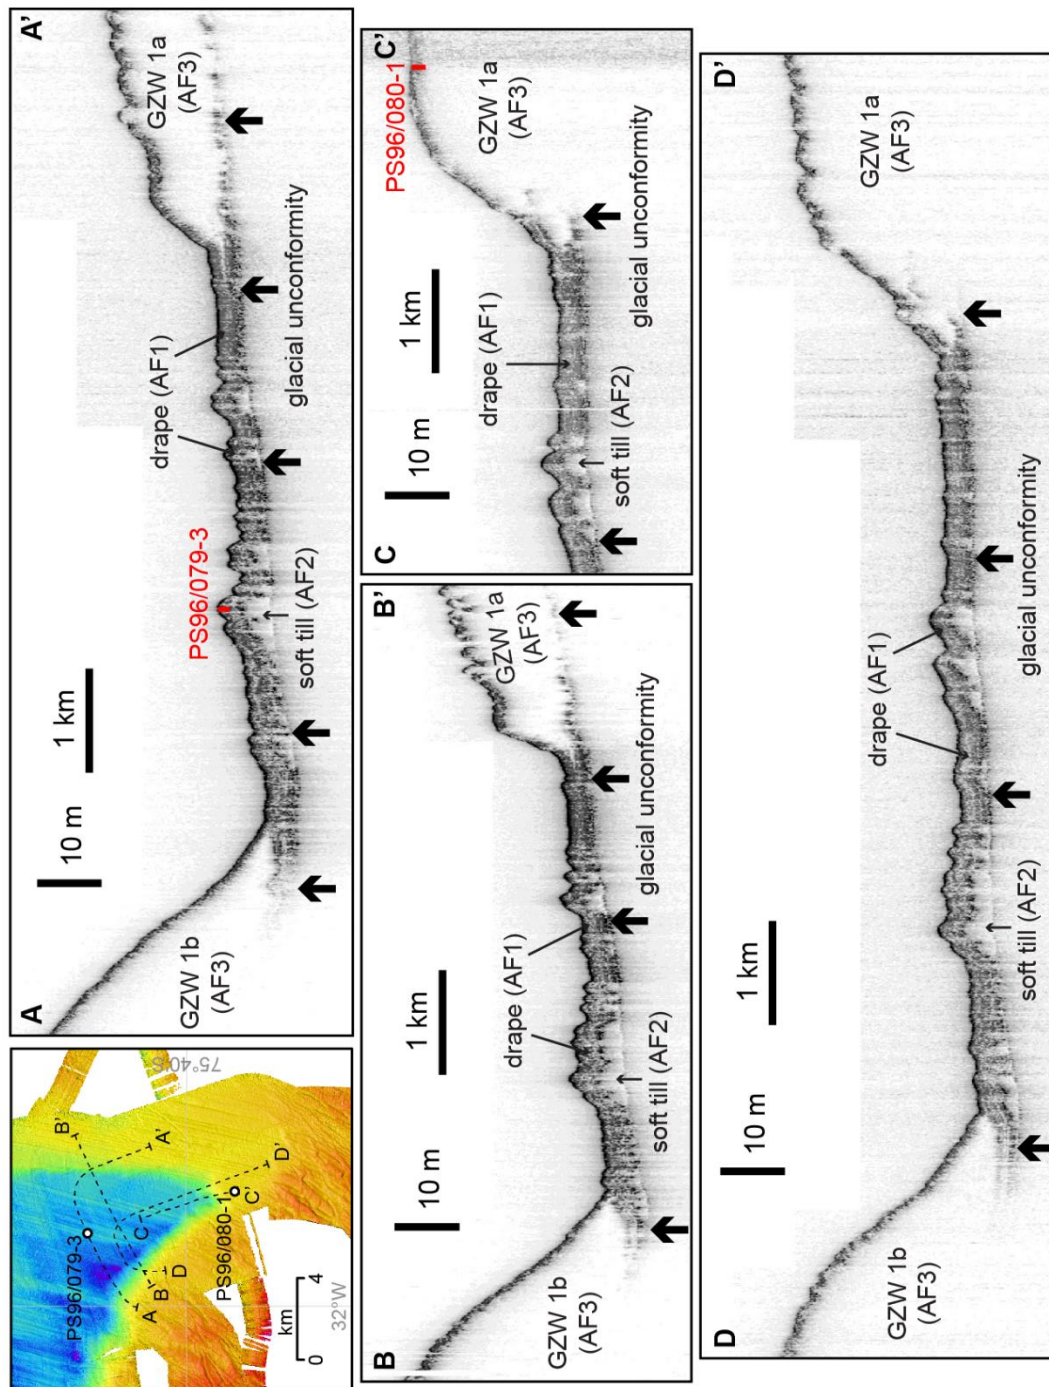



91 **Figure DR4:** Detailed bathymetric maps of core locations PS96/079-3 and  
92 PS96/080-1.

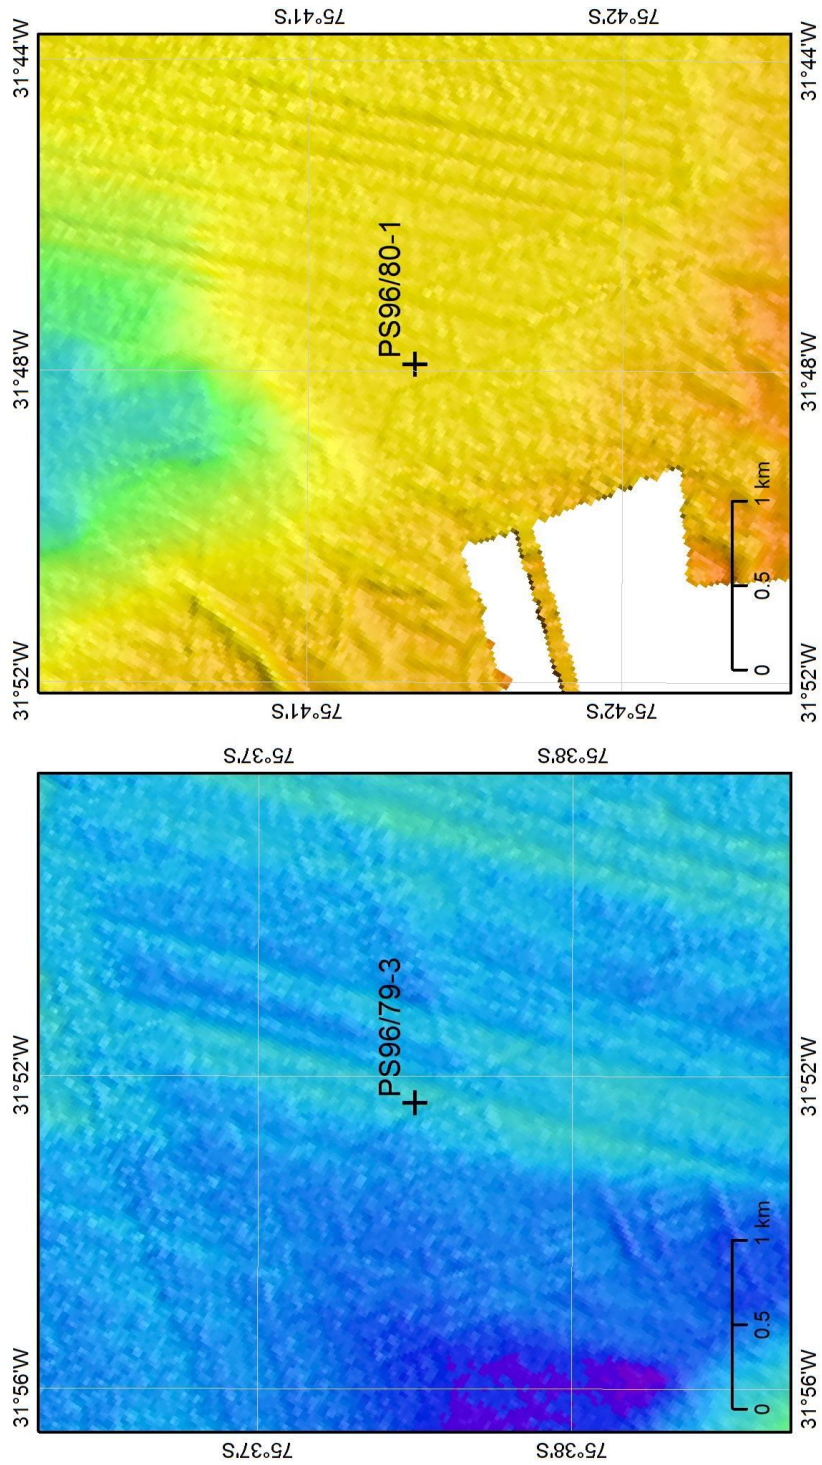

**Figure DR5 (next 3 pages):** X-radiograph (positives) examples for lithofacies identified in the studied cores. PS96/079-3: a) Laminated mud (Ml) in between laminated and stratified mud alternating with gravelly sandy mud and gravelly muddy sand (MGSl); b) laminated and stratified mud alternating with gravelly sandy mud and gravelly muddy sand (MGSl); c) folded mud (Mf); d) massive gravelly muddy sand with inclined, erosional base (SGMm) on top of laminated and stratified mud alternating with gravelly sandy mud and gravelly muddy sand (MGSl). PS96/080-1: e) consolidated sandy mud with gravel- to pebble-sized intraclasts (MSI); f) massive muddy diamicton with some diatoms (Dmb) on top of massive, purely terrigenous muddy diamicton (Dmt); g) massive, purely terrigenous muddy diamicton (Dmt). Each X-radiograph is 10 cm wide, and white areas are voids in the sediment slabs caused by large gravel grains/pebbles or sample processing.

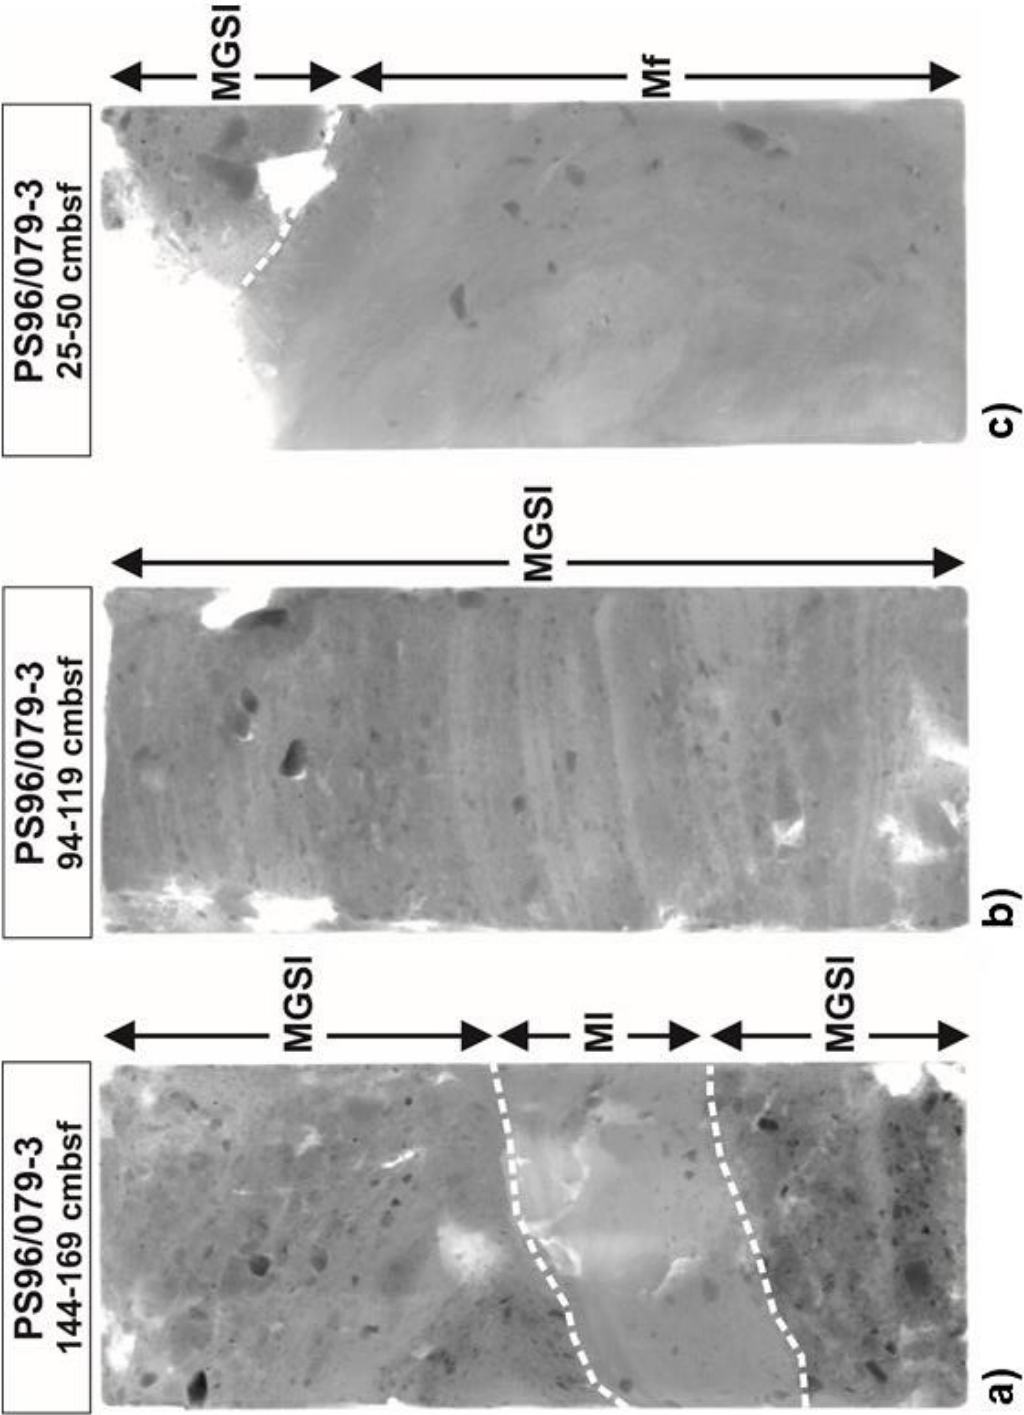

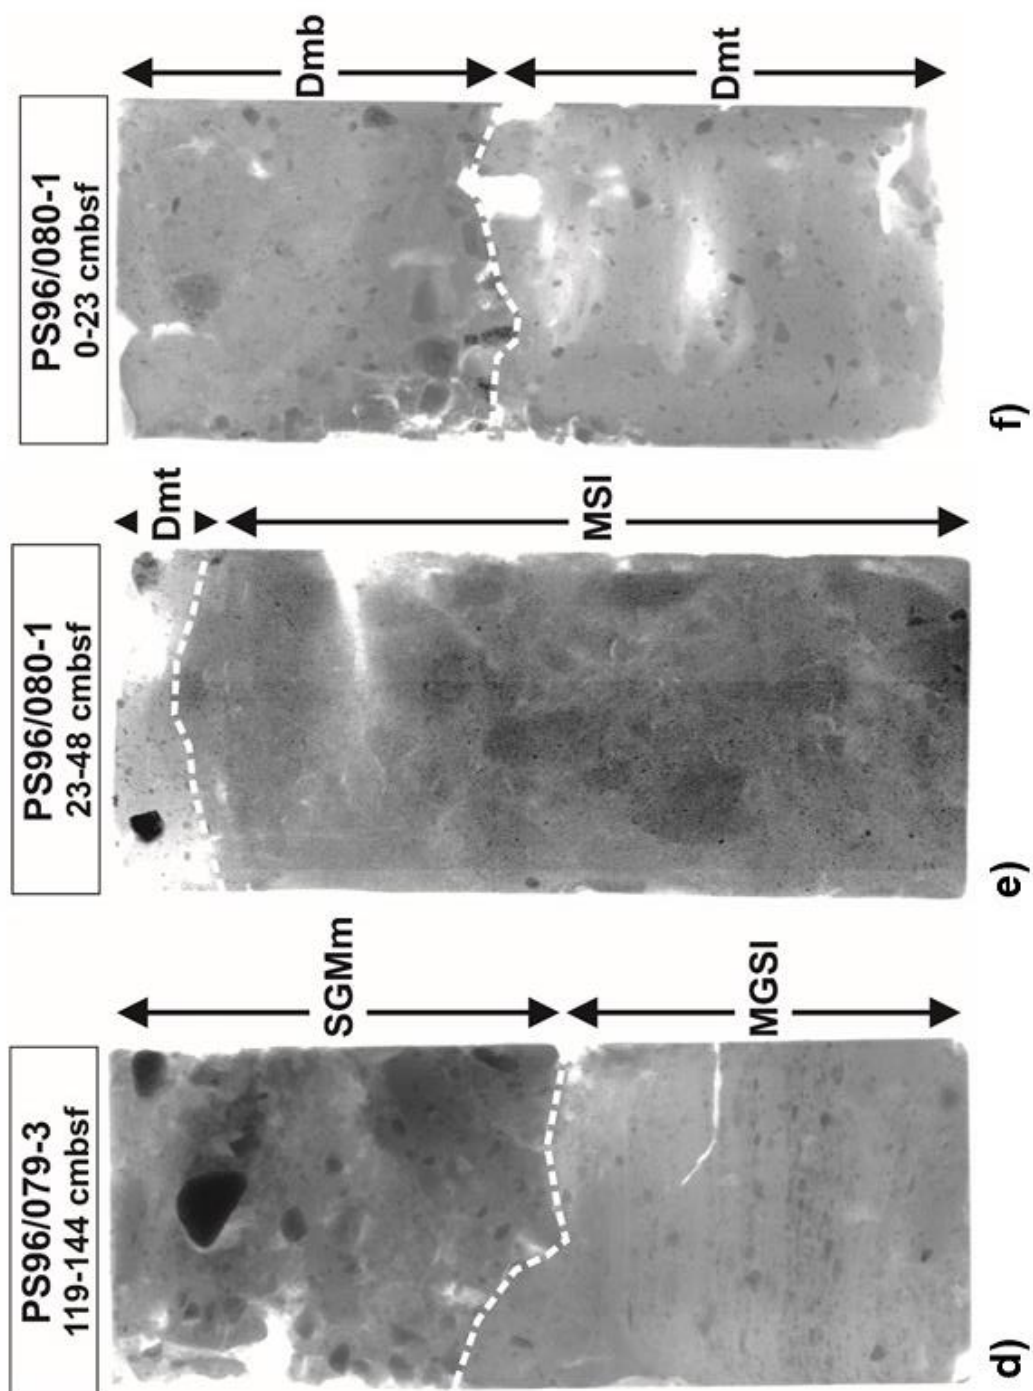

113 **Figure DR5 (continued)**

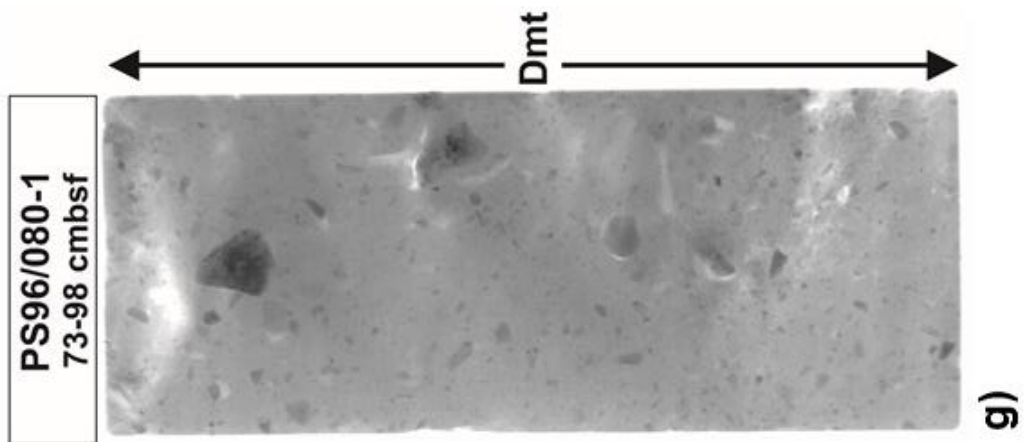

114

115

116

117

118

119 **Figure DR6 (next page):** Sample horizons of AMS  $^{14}\text{C}$  dated foraminifer shells in

120 cores PS96/079-3 and PS96/080-1 (orange boxes) in relation to sediment lithology

121 visualised by X-radiograph positives. a) PS96/079-3 17 cmbsf (cm below surface):

122 b) PS96/079-3 150 cmbsf; c) PS96/080-1 20 cmbsf; d) PS96/080-1 120 cm cmbsf.

123 Each X-radiograph is 10 cm wide, and white areas are voids in the sediment slabs

124 caused by large gravel grains/pebbles or sample processing. For details of AMS  $^{14}\text{C}$

125 dates, see Table DR2.

126



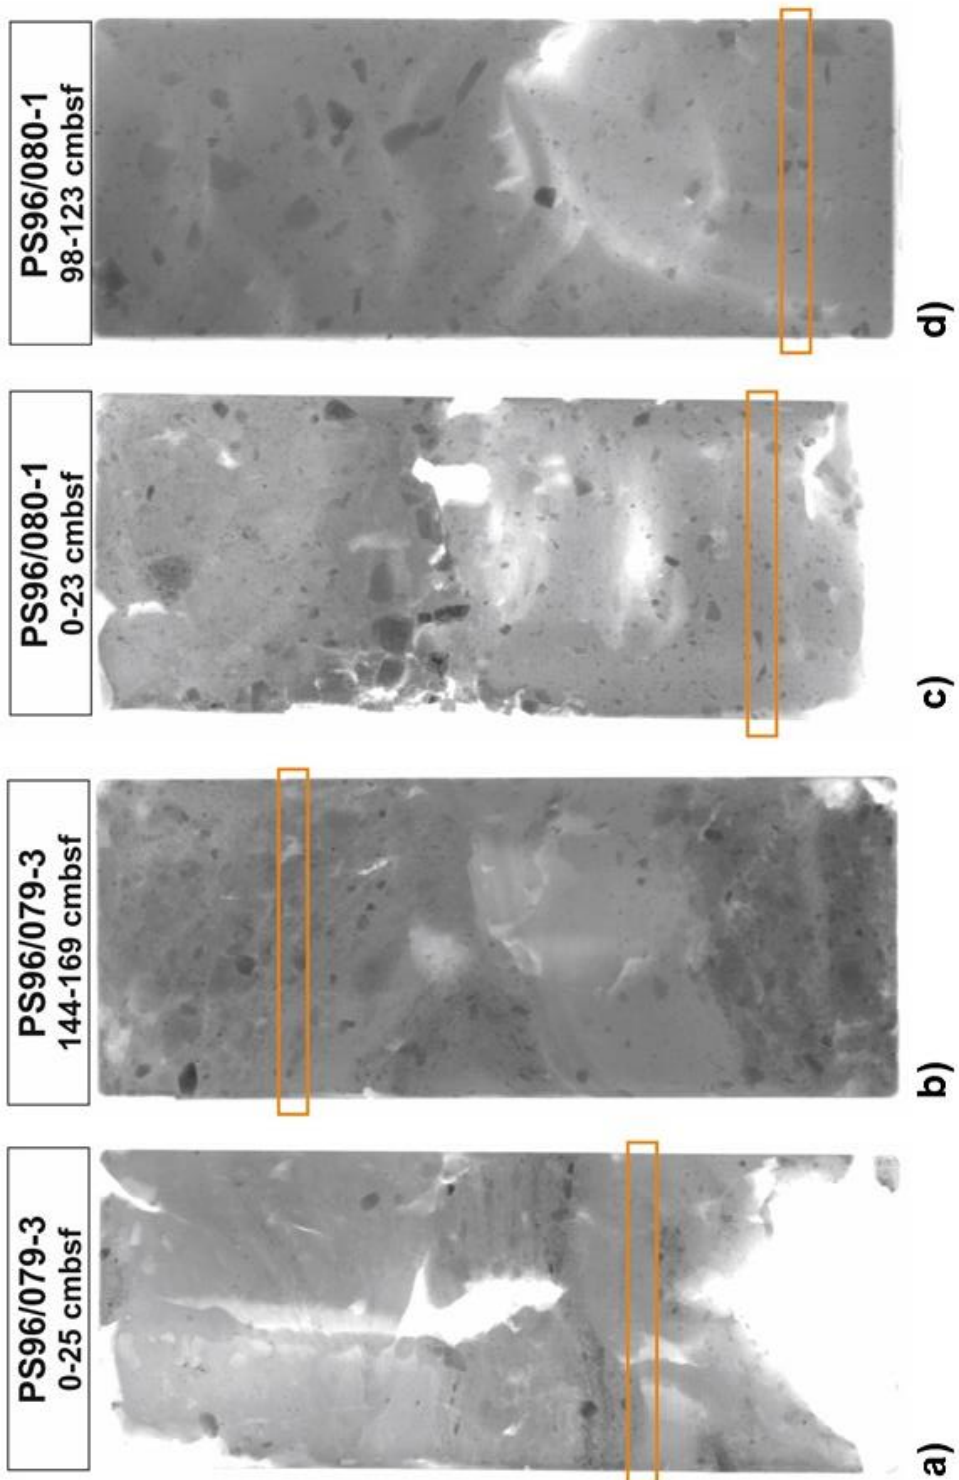

129     **SUPPLEMENTARY REFERENCES**

- 130     Anderson, J. B., and Andrews, J. T., 1999, Radiocarbon constraints on ice sheet  
131             advance and retreat in the Weddell Sea, Antarctica: *Geology*, v. 27, p. 179-  
132             182.
- 133     Arndt, J. E., Schenke, H. W., Jakobsson, M., Nitsche, F. O., Buys, G., Goleby, B.,  
134             Rebesco, M., Bohoyo, F., Hong, J.-K., Black, J., Greku, R., Udintsev, G.,  
135             Barrios, F., Reynoso-Peralta, W., Taisei, M., and Wigley, R., 2013, The  
136             International Bathymetric Chart of the Southern Ocean (IBCSO) Version 1.0  
137             - A new bathymetric compilation covering circum-Antarctic waters:  
138             *Geophysical Research Letters*, v. 40, p. 3111-3117.
- 139     Domack, E.W., Jacobson, E.A., Shipp, S., and Anderson, J.B., 1999, Late  
140             Pleistocene-Holocene retreat of the west Antarctic ice-sheet system in the  
141             Ross sea: Part 2. Sedimentologic and stratigraphic signature: *Geological*  
142             *Society of America Bulletin*, v. 111, p. 1517-1536.
- 143     Heroy, D.C., and Anderson, J.B., 2007, Radiocarbon constraints on Antarctic  
144             Peninsula Ice Sheet retreat following the Last Glacial Maximum (LGM):  
145             *Quaternary Science Reviews*, v. 26, p. 3286-3297.
- 146     Hillenbrand, C.-D., Larter, R.D., Dowdeswell, J.A., Ehrmann, W., Ó Cofaigh, C.,  
147             Benetti, S., Graham, A.G.C., and Grobe, H., 2010, The sedimentary legacy of  
148             a palaeo-ice stream on the shelf of the southern Bellingshausen Sea: clues to  
149             West Antarctic glacial history during the Late Quaternary: *Quaternary*  
150             *Science Reviews*, v. 29, p. 2741-2763.
- 151     Hillenbrand, C.-D., Melles, M., Kuhn, G., and Larter, R. D., 2012, Marine geological  
152             constraints for the grounding-line position of the Antarctic Ice Sheet on the  
153             southern Weddell Sea shelf at the Last Glacial Maximum: *Quaternary Science*  
154             *Reviews*, v. 32, p. 25-47.
- 155     McKay, R., Browne, G., Carter, L., Cowan, E., Dunbar, G., Krissek, L., Naish, T.,  
156             Powell, R., Reed, J., Talarico, F., and Wilch, T., 2009, The stratigraphic  
157             signature of the late Cenozoic Antarctic Ice Sheets in the Ross Embayment:  
158             *Geological Society of America Bulletin*, v. 121, p. 1537-1561.
- 159     McKay, R., Naish, T., Powell, R., Barrett, P., Scherer, R., Talarico, F., Kyle, P.,  
160             Monien, D., Kuhn. G., Jackolski, C., and Williams, T., 2012, Pleistocene  
161             variability of Antarctic Ice Sheet extent in the Ross Embayment: *Quaternary*  
162             *Science Reviews*, v. 34, p. 93-112.



163 Miller, H., and Oerter, H. (eds.), 1991, The Expedition ANTARKTIS-VIII of RV  
 164 "Polarstern" 1989/1990 – Report of Leg ANT-VIII/5: Reports on Polar and  
 165 Marine Research, v. 86, 155 pp.

166 Passchier, S., Browne, G., Field, B., Fielding, C.R, Krissek, L.R, Panter, K., Pekar,  
 167 S.F., and the ANDRILL-SMS Science Team, 2011, Early and middle  
 168 Miocene Antarctic glacial history from the sedimentary facies distribution in  
 169 the AND-2A drill hole, Ross Sea, Antarctica: Geological Society of America  
 170 Bulletin, v. 123, p. 2352-2365.

171 RAISED Consortium, 2014, A community-based geological reconstruction of  
 172 Antarctic Ice Sheet deglaciation since the Last Glacial Maximum: Quaternary  
 173 Science Reviews, v. 100, p. 1-9.

174 Reimer, P. J., Bard, E., Bayliss, A., Beck, J. W., Blackwell, P. G., Bronk Ramsey, C.,  
 175 Buck, C. E., Cheng, H., Edwards, R. L., Friedrich, M., Grootes, P. M.,  
 176 Guilderson, T. P., Hafliðason, H., Hajdas, I., Hatté, C., Heaton, T. J.,  
 177 Hoffmann, D. L., Hogg, A. G., Hughen, K. A., Kaiser, K. F., Kromer, B.,  
 178 Manning, S. W., Niu, M., Reimer, R. W., Richards, D. A., Scott, E. M.,  
 179 Southon, J. R., Staff, R. A., Turney, C. S. M., and van der Plicht, J., 2013,  
 180 INTCAL13 and MARINE13 radiocarbon age calibration curves, 0–50,000  
 181 years cal BP: Radiocarbon, v. 55, no. 4, p. 1869-1887.

182 Schröder, M. (ed.), 2016, The Expedition PS96 of the Research Vessel  
 183 POLARSTERN to the southern Weddell Sea in 2015/2016: Reports on Polar  
 184 and Marine research, v. 700, 143 pp.

185 Stollendorf, T., Schenke, H.-W., and Anderson, J. B., 2012, LGM ice sheet extent in the  
 186 Weddell Sea: evidence for diachronous behavior of Antarctic Ice Sheets:  
 187 Quaternary Science Reviews, v. 48, p. 20-31.

188 Stuiver, M., and Reimer, P.J., 1993, Extended  $^{14}\text{C}$  data base and revised CALIB 3.0  
 189  $^{14}\text{C}$  age calibration program: Radiocarbon, v. 35, p. 215-230.

190 Tripsanas, E., Piper, D.J.W., Jenner, K.A., and Bryant, W.R., 2008, Submarine mass-  
 191 transport facies: new perspectives on flow processes from cores on the eastern  
 192 North American margin: Sedimentology, v. 55, p. 97-136.

193 Wacker, L., Bonani, G., Friedrich, M., Hajdas, I., Kromer, B., Němec, M., Ruff, M.,  
 194 Suter, M., Synal, H. A., and Vockenhuber, C., 2010, MICADAS: Routine and  
 195 High-Precision Radiocarbon Dating: Radiocarbon, v. 52, no. 2-3, p. 252-262.
